# Supplementary material for: Factors associated with diarrhea and acute respiratory infection in children under two years of age in rural Bangladesh
Source: Springer Nature journal article supplement (doi:10.1186/s12887-019-1738-6), 2019-10-27

## Study flow chart

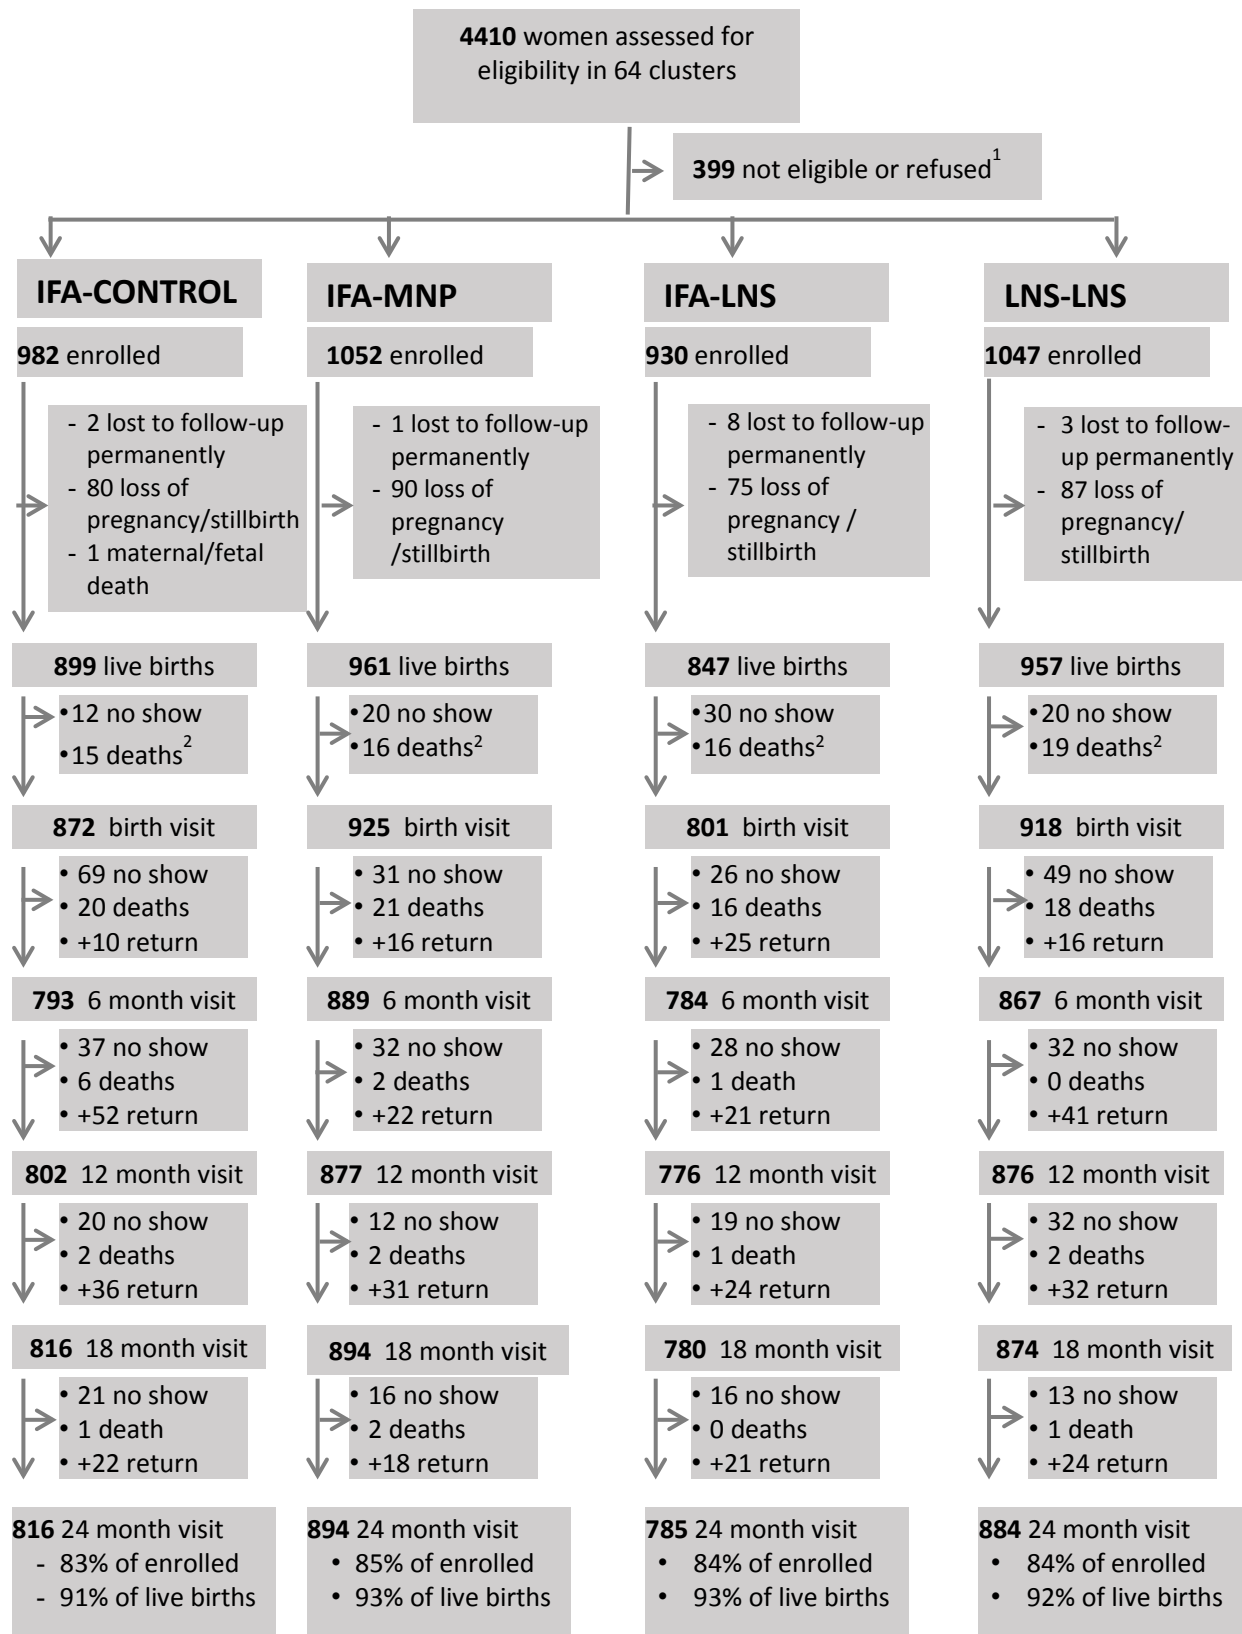

Supplement: MOESM2 [file 17311176]
